# Supplementary material for: Non-selective inhibition of inappropriate motor-tendencies during response-conflict by a fronto-subthalamic mechanism
Source: eLife journal article supplement (doi:10.7554/elife.42959), 2019-05-07
Supplement: supp [file elife-42959-supp-v1.zip]

Archive with 2 entries (2 files):
- elife_poa_e42959_Transparent_Reporting_File.pdf
- elife_poa_e42959_Figure_5_figure_supplement_1.eps
